# Supplementary material
Source: MDPI journal article supplement (https://www.mdpi.com/2075-4442/12/4/110)
Supplement: s1 [file s1]

Archive with 8 entries (8 files):
- lubricants-2917761-supplementary-for conversion.pdf
- Video S1_R=30 mm (1).mp4
- Video S2_R=30 mm (2).mp4
- Video S3_R=30 mm (3).mp4
- Video S4_R=40 mm (1).mp4
- Video S5_R=40 mm (2).mp4
- Video S6_R=50 mm (1).mp4
- Video S7_R=50 mm (2).mp4
